# Supplementary material for: Nur77-activated lncRNA WFDC21P attenuates hepatocarcinogenesis via modulating glycolysis
Source: PubMed Central journal article supplement (PMC7067692; doi:10.1038/s41388-020-1158-y), 2020-01-20
Supplement: 41388_2020_1158_MOESM2_ESM.pdf [file 41388_2020_1158_MOESM2_ESM.pdf]

**Table S1. Relationships between WFDC21P expression and the clinicopathological features of patients with HCC.**

| feature         | No. of patients | WFDC21P |     | $\chi^2$ | <i>p</i> -value |
|-----------------|-----------------|---------|-----|----------|-----------------|
|                 |                 | High    | Low |          |                 |
| Gender          |                 |         |     | 3.31     | 0.0688          |
| Male            | 102             | 33      | 69  |          |                 |
| Female          | 14              | 8       | 6   |          |                 |
| Age (years)     |                 |         |     | 0.0544   | 0.8139          |
| $\leq 60$       | 78              | 27      | 51  |          |                 |
| $> 60$          | 38              | 14      | 24  |          |                 |
| Tumorous number |                 |         |     | 7.165    | 0.0074          |
| 1               | 70              | 28      | 42  |          |                 |
| $\geq 2$        | 17              | 1       | 16  |          |                 |
| unknown         | 29              |         |     |          |                 |
| Tumor size (cm) |                 |         |     | 8.488    | 0.0036          |
| $\leq 5$        | 58              | 28      | 30  |          |                 |
| $> 5$           | 58              | 13      | 45  |          |                 |
| Embolus         |                 |         |     | 6.178    | 0.0129          |
| No              | 25              | 9       | 16  |          |                 |
| Yes             | 20              | 1       | 19  |          |                 |
| unknown         | 71              |         |     |          |                 |
| Tumor capsule   |                 |         |     | 0.7      | 0.4028          |
| No              | 11              | 4       | 7   |          |                 |
| Yes             | 34              | 8       | 26  |          |                 |
| unknown         | 71              |         |     |          |                 |
| AJCC stage      |                 |         |     | 4.846    | 0.0277          |
| 1-2             | 42              | 17      | 25  |          |                 |
| 3-4             | 13              | 1       | 12  |          |                 |
| unknown         | 61              |         |     |          |                 |
| TNM             |                 |         |     | 4.447    | 0.035           |
| T1-2            | 44              | 17      | 27  |          |                 |
| T3-4            | 13              | 1       | 12  |          |                 |
| unknown         | 59              |         |     |          |                 |
| Survival        |                 |         |     | 4.724    | 0.0297          |
| survival        | 49              | 25      | 24  |          |                 |
| deceased        | 42              | 12      | 30  |          |                 |
| unknown         | 25              |         |     |          |                 |
