# Supplementary material for: Nur77-activated lncRNA WFDC21P attenuates hepatocarcinogenesis via modulating glycolysis
Source: PubMed Central journal article supplement (PMC7067692; doi:10.1038/s41388-020-1158-y), 2020-01-20
Supplement: 41388_2020_1158_MOESM3_ESM.pdf [file 41388_2020_1158_MOESM3_ESM.pdf]

**Table S2. Detailed clinical information of HCC patients used in this study.**

| Number | Organ | Pathology Type  | Histologic type | Gender | Age | AJCC Stage | Tumor capsule | Tumor size (cm) | Tumor number | Tumor embolus | Primary organ | T   | N   | M   | Surgery Date | Visit Date | Survival Time | Survival Status |
|--------|-------|-----------------|-----------------|--------|-----|------------|---------------|-----------------|--------------|---------------|---------------|-----|-----|-----|--------------|------------|---------------|-----------------|
| 1      | Liver | Hepatocarcinoma | Carcinoma       | Male   | 12  | N/A        | N/A           | 4               | 1            | Yes           | Yes           | N/A | N/A | N/A | 2008/8/8     | 2015.9     | 85            | survival        |
| 2      | Liver | Hepatocarcinoma | Para/Carcinoma  | Female | 23  | N/A        | N/A           | 9               | N/A          | N/A           | Yes           | N/A | N0  | M0  | N/A          | N/A        | N/A           | N/A             |
| 3      | Liver | Hepatocarcinoma | Carcinoma       | Male   | 29  | N/A        | N/A           | 8               | N/A          | N/A           | Yes           | N/A | N/A | N/A | 2006/4/20    | 2015.9     | 113           | survival        |
| 4      | Liver | Hepatocarcinoma | Carcinoma       | Male   | 37  | 2          | incomplete    | 4.5             | 2            | N/A           | Yes           | T2  | N0  | M0  | 2012/5/4     | 2015/9/5   | 40            | deceased        |
| 7      | Liver | Hepatocarcinoma | Carcinoma       | Male   | 38  | N/A        | N/A           | 2.2             | 1            | Yes           | Yes           | N/A | N/A | N/A | 2008/7/29    | 2015.9     | 86            | survival        |
| 5      | Liver | Hepatocarcinoma | Carcinoma       | Male   | 38  | 2          | complete      | 1               | 2            | N/A           | Yes           | T2  | N0  | M0  | 2012/1/18    | 2016.05    | 51            | survival        |
| 6      | Liver | Hepatocarcinoma | Carcinoma       | Male   | 38  | 1          | complete      | 3               | 1            | N/A           | Yes           | T1  | N0  | M0  | 2012/2/10    | 2014/9/1   | 29            | deceased        |
| 10     | Liver | Hepatocarcinoma | Para/Carcinoma  | Male   | 39  | N/A        | N/A           | 14              | 2            | No            | Yes           | N/A | N/A | N/A | 2008/6/11    | 2015.9     | 87            | survival        |
| 8      | Liver | Hepatocarcinoma | Para/Carcinoma  | Male   | 39  | N/A        | N/A           | 8.5             | 1            | No            | Yes           | N/A | N/A | N/A | 2009/8/25    | 2015.9     | 73            | survival        |
| 9      | Liver | Hepatocarcinoma | Carcinoma       | Male   | 39  | N/A        | N/A           | 7               | 1            | No            | Yes           | N/A | N/A | N/A | 2009/9/7     | 2015.9     | 72            | survival        |
| 11     | Liver | Hepatocarcinoma | Carcinoma       | Male   | 40  | 1          | complete      | 4.5             | 1            | N/A           | Yes           | T1  | N0  | M0  | 2012/2/21    | 2016.05    | 50            | survival        |
| 13     | Liver | Hepatocarcinoma | Carcinoma       | Male   | 41  | N/A        | N/A           | 3               | N/A          | No            | Yes           | N/A | N0  | M0  | N/A          | N/A        | N/A           | N/A             |
| 14     | Liver | Hepatocarcinoma | Para/Carcinoma  | Male   | 41  | N/A        | N/A           | 5               | N/A          | N/A           | Yes           | N/A | N0  | M0  | N/A          | N/A        | N/A           | N/A             |
| 12     | Liver | Hepatocarcinoma | Para/Carcinoma  | Male   | 41  | 1          | N/A           | 9               | 1            | N/A           | Yes           | T1  | N0  | M0  | 2012/4/28    | 2016.05    | 48            | survival        |
| 17     | Liver | Hepatocarcinoma | Carcinoma       | Male   | 42  | 2          | N/A           | 5               | N/A          | N/A           | Yes           | T2  | N0  | M0  | N/A          | N/A        | N/A           | N/A             |
| 18     | Liver | Hepatocarcinoma | Carcinoma       | Male   | 42  | N/A        | incomplete    | 7.1             | N/A          | N/A           | Yes           | N/A | N0  | M0  | N/A          | N/A        | N/A           | N/A             |
| 15     | Liver | Hepatocarcinoma | Para/Carcinoma  | Male   | 42  | 1          | complete      | 7               | 1            | N/A           | Yes           | T1  | N0  | M0  | 2012/2/3     | 2016.05    | 50            | survival        |
| 16     | Liver | Hepatocarcinoma | Para/Carcinoma  | Male   | 42  | 1          | complete      | 4               | 1            | N/A           | Yes           | T1  | N0  | M0  | 2012/3/1     | 2016.05    | 49            | survival        |
| 21     | Liver | Hepatocarcinoma | Carcinoma       | Male   | 43  | N/A        | N/A           | 5.5             | N/A          | N/A           | Yes           | N/A | N0  | M0  | N/A          | N/A        | N/A           | N/A             |
| 20     | Liver | Hepatocarcinoma | Carcinoma       | Male   | 43  | 1          | complete      | 10              | 1            | N/A           | Yes           | T1  | N0  | M0  | 2012/2/15    | 2016.05    | 50            | survival        |
| 19     | Liver | Hepatocarcinoma | Para/Carcinoma  | Male   | 43  | 1          | incomplete    | 1.8             | 1            | N/A           | Yes           | T1  | N0  | M0  | 2012/4/21    | 2016.05    | 48            | survival        |
| 22     | Liver | Hepatocarcinoma | Para/Carcinoma  | Male   | 44  | N/A        | N/A           | 6               | 1            | No            | Yes           | N/A | N/A | N/A | 2008/12/10   | 2011/3/9   | 27            | deceased        |
| 27     | Liver | Hepatocarcinoma | Carcinoma       | Male   | 45  | N/A        | N/A           | 3               | 1            | Yes           | Yes           | N/A | N/A | N/A | 2009/7/7     | 2015.9     | 74            | survival        |
| 25     | Liver | Hepatocarcinoma | Para/Carcinoma  | Male   | 45  | N/A        | N/A           | 4               | 1            | Yes           | Yes           | N/A | N/A | N/A | 2010/12/3    | 2012/4/15  | 16            | deceased        |
| 23     | Liver | Hepatocarcinoma | Para/Carcinoma  | Male   | 45  | 1          | complete      | 16              | 1            | N/A           | Yes           | T1  | N0  | M0  | 2012/2/17    | 2016/6/14  | 51            | deceased        |
| 24     | Liver | Hepatocarcinoma | Para/Carcinoma  | Male   | 45  | N/A        | N/A           | 9               | 1            | No            | Yes           | N/A | N/A | N/A | 2009/5/21    | 2012/2/21  | 33            | deceased        |
| 28     | Liver | Hepatocarcinoma | Carcinoma       | Male   | 45  | N/A        | N/A           | 7               | 1            | No            | Yes           | N/A | N/A | N/A | 2013/1/25    | 2014/8/31  | 19            | deceased        |
| 26     | Liver | Hepatocarcinoma | Carcinoma       | Male   | 45  | N/A        | N/A           | 5.5             | 1            | Yes           | Yes           | N/A | N/A | N/A | 2013/5/16    | 2015/6/16  | 25            | deceased        |
| 29     | Liver | Hepatocarcinoma | Carcinoma       | Male   | 46  | N/A        | N/A           | 3.5             | 1            | Yes           | Yes           | N/A | N/A | N/A | 2012/1/11    | 2014/11/7  | 34            | deceased        |
| 33     | Liver | Hepatocarcinoma | Carcinoma       | Male   | 47  | N/A        | N/A           | 10              | 1            | No            | Yes           | N/A | N/A | N/A | 2011/4/20    | 2015.9     | 53            | survival        |
| 32     | Liver | Hepatocarcinoma | Para/Carcinoma  | Male   | 47  | N/A        | N/A           | 7.5             | 1            | No            | Yes           | N/A | N/A | N/A | 2010/3/12    | 2012/7/26  | 28            | deceased        |
| 30     | Liver | Hepatocarcinoma | Carcinoma       | Male   | 47  | 1          | complete      | 6               | 1            | N/A           | Yes           | T1  | N0  | M0  | 2012/2/29    | 2013/10/15 | 20            | deceased        |
| 31     | Liver | Hepatocarcinoma | Carcinoma       | Male   | 47  | N/A        | complete      | 13.2            | N/A          | N/A           | Yes           | N/A | N0  | M0  | N/A          | N/A        | N/A           | N/A             |
| 35     | Liver | Hepatocarcinoma | Carcinoma       | Male   | 48  | 2          | incomplete    | 3.5             | 7            | N/A           | Yes           | T2  | N0  | M0  | 2012/2/6     | 2015/3/15  | 37            | deceased        |
| 36     | Liver | Hepatocarcinoma | Carcinoma       | Female | 48  | N/A        | N/A           | 3.5             | 1            | Yes           | Yes           | N/A | N/A | N/A | 2011/2/14    | 2015.9     | 55            | survival        |
| 34     | Liver | Hepatocarcinoma | Para/Carcinoma  | Male   | 48  | 3          | incomplete    | 6               | 3            | N/A           | Yes           | T3  | N0  | M0  | 2012/1/18    | 2016.05    | 51            | survival        |
| 38     | Liver | Hepatocarcinoma | Para/Carcinoma  | Male   | 49  | N/A        | N/A           | 11              | 1            | No            | Yes           | N/A | N/A | N/A | 2008/5/13    | 2008/12/9  | 7             | deceased        |
| 37     | Liver | Hepatocarcinoma | Carcinoma       | Male   | 49  | N/A        | N/A           | 9               | 1            | No            | Yes           | N/A | N/A | N/A | 2009/7/3     | 2010/7/30  | 12            | deceased        |
| 40     | Liver | Hepatocarcinoma | Carcinoma       | Male   | 50  | 3          | incomplete    | 7               | 7            | N/A           | Yes           | T3  | N0  | M0  | 2012/5/8     | 2015/2/15  | 33            | deceased        |
| 42     | Liver | Hepatocarcinoma | Carcinoma       | Male   | 50  | N/A        | N/A           | 5               | 1            | Yes           | Yes           | N/A | N/A | N/A | 2009/11/16   | 2015/1/7   | 62            | deceased        |
| 39     | Liver | Hepatocarcinoma | Para/Carcinoma  | Female | 50  | 1          | complete      | 2.5             | 1            | N/A           | Yes           | T1  | N0  | M0  | 2012/1/18    | 2016.05    | 51            | survival        |
| 41     | Liver | Hepatocarcinoma | Carcinoma       | Female | 50  | 2          | N/A           | 10              | N/A          | N/A           | Yes           | T2  | N0  | M0  | N/A          | N/A        | N/A           | N/A             |
| 45     | Liver | Hepatocarcinoma | Para/Carcinoma  | Male   | 51  | N/A        | N/A           | 2.4             | 1            | Yes           | Yes           | N/A | N/A | N/A | 2008/7/23    | 2009/5/2   | 10            | deceased        |
| 43     | Liver | Hepatocarcinoma | Para/Carcinoma  | Male   | 51  | N/A        | N/A           | 7               | 1            | No            | Yes           | N/A | N/A | N/A | 2009/9/23    | 2015.9     | 72            | survival        |

|    |       |                 |                |        |    |     |            |      |     |     |     |     |     |     |            |            |     |          |
|----|-------|-----------------|----------------|--------|----|-----|------------|------|-----|-----|-----|-----|-----|-----|------------|------------|-----|----------|
| 44 | Liver | Hepatocarcinoma | Carcinoma      | Male   | 51 | N/A | N/A        | 5    | 1   | Yes | Yes | N/A | N/A | N/A | 2010/1/14  | 2012/8/20  | 31  | deceased |
| 46 | Liver | Hepatocarcinoma | Carcinoma      | Male   | 52 | N/A | N/A        | 5    | 1   | Yes | Yes | N/A | N/A | N/A | 2008/9/9   | 2015.9     | 84  | survival |
| 52 | Liver | Hepatocarcinoma | Para/Carcinoma | Male   | 53 | N/A | N/A        | 6    | >2  | No  | Yes | N/A | N/A | N/A | 2006/10/17 | 2007/7/26  | 9   | deceased |
| 51 | Liver | Hepatocarcinoma | Carcinoma      | Male   | 53 | N/A | N/A        | 17   | 1   | No  | Yes | N/A | N/A | N/A | 2009/6/30  | 2011/9/16  | 21  | deceased |
| 47 | Liver | Hepatocarcinoma | Para/Carcinoma | Male   | 53 | 3   | N/A        | 5.5  | N/A | N/A | Yes | T3  | N0  | M0  | N/A        | N/A        | N/A | N/A      |
| 48 | Liver | Hepatocarcinoma | Para/Carcinoma | Male   | 53 | 3   | N/A        | 7    | N/A | N/A | Yes | T3  | N0  | M0  | N/A        | N/A        | N/A | N/A      |
| 50 | Liver | Hepatocarcinoma | Para/Carcinoma | Male   | 53 | N/A | N/A        | 6    | 1   | No  | Yes | N/A | N/A | N/A | 2008/12/9  | 2012/2/2   | 38  | deceased |
| 49 | Liver | Hepatocarcinoma | Carcinoma      | Male   | 53 | 2   | N/A        | 10   | N/A | N/A | Yes | T2  | N0  | M0  | N/A        | N/A        | N/A | N/A      |
| 53 | Liver | Hepatocarcinoma | Carcinoma      | Male   | 54 | 1   | complete   | 3.8  | 1   | N/A | Yes | T1  | N0  | M0  | 2012/2/2   | 2016.05    | 50  | survival |
| 54 | Liver | Hepatocarcinoma | Para/Carcinoma | Female | 54 | 4   | N/A        | 13   | N/A | N/A | Yes | T4  | N0  | M1  | N/A        | N/A        | N/A | N/A      |
| 55 | Liver | Hepatocarcinoma | Para/Carcinoma | Female | 54 | N/A | N/A        | 10   | 2   | No  | Yes | N/A | N/A | N/A | 2007/10/10 | 2009/4/4   | 18  | deceased |
| 59 | Liver | Hepatocarcinoma | Carcinoma      | Male   | 55 | N/A | N/A        | 10   | 1   | No  | Yes | N/A | N/A | N/A | 2007/3/2   | 2008/5/1   | 14  | deceased |
| 60 | Liver | Hepatocarcinoma | Carcinoma      | Male   | 55 | N/A | N/A        | 5    | 1   | Yes | Yes | N/A | N/A | N/A | 2011/2/22  | 2012/6/22  | 16  | deceased |
| 57 | Liver | Hepatocarcinoma | Carcinoma      | Male   | 55 | 3   | complete   | 7    | 3   | N/A | Yes | T3  | N0  | M0  | 2012/2/9   | 2012/8/9   | 18  | deceased |
| 56 | Liver | Hepatocarcinoma | Carcinoma      | Male   | 55 | 1   | complete   | 12.5 | 1   | N/A | Yes | T1  | N0  | M0  | 2012/4/20  | 2016.05    | 48  | survival |
| 58 | Liver | Hepatocarcinoma | Carcinoma      | Male   | 55 | 2   | N/A        | 6    | N/A | N/A | Yes | T2  | N0  | M0  | N/A        | N/A        | N/A | N/A      |
| 61 | Liver | Hepatocarcinoma | Carcinoma      | Male   | 56 | N/A | complete   | 3.3  | 1   | N/A | Yes | T1  | N0  | M1  | 2011/3/21  | 2014/9/20  | 42  | deceased |
| 62 | Liver | Hepatocarcinoma | Carcinoma      | Male   | 56 | 2   | incomplete | 1.6  | 2   | N/A | Yes | T2  | N0  | M0  | 2011/3/25  | 2016.05    | 61  | survival |
| 63 | Liver | Hepatocarcinoma | Carcinoma      | Male   | 56 | 2   | complete   | 4    | 3   | N/A | Yes | T2  | N0  | M0  | 2012/4/21  | 2016.05    | 48  | survival |
| 64 | Liver | Hepatocarcinoma | Carcinoma      | Male   | 56 | 2   | complete   | 5    | 2   | N/A | Yes | T2  | N0  | M0  | 2012/4/28  | 2015/12/4  | 44  | deceased |
| 65 | Liver | Hepatocarcinoma | Carcinoma      | Male   | 57 | 1   | complete   | 1.5  | 1   | N/A | Yes | T1  | N0  | M0  | 2012/4/19  | 2014/12/3  | 32  | deceased |
| 68 | Liver | Hepatocarcinoma | Carcinoma      | Male   | 58 | N/A | incomplete | 3.5  | 1   | N/A | Yes | T1  | N1  | M0  | 2012/4/25  | 2013/12/15 | 20  | deceased |
| 69 | Liver | Hepatocarcinoma | Carcinoma      | Female | 58 | N/A | N/A        | 4.7  | N/A | N/A | Yes | N/A | N/A | N/A | 2009/12/2  | 2015.9     | 69  | survival |
| 66 | Liver | Hepatocarcinoma | Carcinoma      | Male   | 58 | 2   | complete   | 4.5  | 2   | N/A | Yes | T2  | N0  | M0  | 2012/2/1   | 2016.05    | 50  | survival |
| 67 | Liver | Hepatocarcinoma | Para/Carcinoma | Male   | 58 | 3   | complete   | 12   | 4   | N/A | Yes | T3  | N0  | M0  | 2012/2/8   | 2013/8/15  | 18  | deceased |
| 70 | Liver | Hepatocarcinoma | Para/Carcinoma | Male   | 59 | N/A | N/A        | 4.5  | N/A | N/A | Yes | N/A | N0  | M0  | N/A        | N/A        | N/A | N/A      |
| 76 | Liver | Hepatocarcinoma | Carcinoma      | Male   | 60 | N/A | N/A        | 3.5  | 1   | Yes | Yes | N/A | N/A | N/A | 2010/1/18  | 2015.9     | 68  | survival |
| 72 | Liver | Hepatocarcinoma | Carcinoma      | Female | 60 | 1   | complete   | 3    | 1   | N/A | Yes | T1  | N0  | M0  | 2011/4/7   | 2016.05    | 60  | survival |
| 71 | Liver | Hepatocarcinoma | Carcinoma      | Male   | 60 | 1   | complete   | 6    | 1   | N/A | Yes | T1  | N0  | M0  | 2012/4/28  | 2016.05    | 48  | survival |
| 77 | Liver | Hepatocarcinoma | Para/Carcinoma | Male   | 60 | N/A | N/A        | 4.5  | 1   | Yes | Yes | N/A | N/A | N/A | 2007/4/26  | 2015.9     | 101 | survival |
| 78 | Liver | Hepatocarcinoma | Para/Carcinoma | Male   | 60 | N/A | N/A        | 4.5  | 1   | Yes | Yes | N/A | N/A | N/A | 2007/7/19  | 2015.9     | 98  | survival |
| 75 | Liver | Hepatocarcinoma | Para/Carcinoma | Male   | 60 | N/A | N/A        | 7    | 1   | No  | Yes | N/A | N/A | N/A | 2009/8/10  | 2015.9     | 73  | survival |
| 73 | Liver | Hepatocarcinoma | Carcinoma      | Male   | 60 | 1   | complete   | 3.5  | 1   | N/A | Yes | T1  | N0  | M0  | 2012/5/7   | 2013/11/15 | 18  | deceased |
| 74 | Liver | Hepatocarcinoma | Carcinoma      | Female | 60 | N/A | N/A        | 4    | N/A | N/A | Yes | N/A | N0  | M0  | N/A        | N/A        | N/A | N/A      |
| 79 | Liver | Hepatocarcinoma | Carcinoma      | Female | 61 | 1   | complete   | 2.5  | 1   | N/A | Yes | T1  | N0  | M0  | 2012/1/18  | 2016.05    | 51  | survival |
| 80 | Liver | Hepatocarcinoma | Carcinoma      | Male   | 61 | 2   | complete   | 3.5  | 2   | N/A | Yes | T2  | N0  | M0  | 2012/4/26  | 2016.05    | 48  | survival |
| 82 | Liver | Hepatocarcinoma | Para/Carcinoma | Male   | 61 | N/A | N/A        | 10   | 1   | No  | Yes | N/A | N/A | N/A | 2009/8/12  | 2014/6/2   | 48  | deceased |
| 83 | Liver | Hepatocarcinoma | Para/Carcinoma | Male   | 61 | N/A | N/A        | 5    | 2   | No  | Yes | N/A | N/A | N/A | 2011/7/1   | 2015.9     | 50  | survival |
| 81 | Liver | Hepatocarcinoma | Carcinoma      | Male   | 61 | 3   | N/A        | 6    | N/A | N/A | Yes | T3  | N0  | M0  | N/A        | N/A        | N/A | N/A      |
| 87 | Liver | Hepatocarcinoma | Carcinoma      | Male   | 62 | 2   | N/A        | 7    | N/A | N/A | Yes | T2  | N0  | M0  | N/A        | N/A        | N/A | N/A      |
| 89 | Liver | Hepatocarcinoma | Carcinoma      | Male   | 62 | N/A | N/A        | 6    | N/A | N/A | Yes | N/A | N0  | M0  | N/A        | N/A        | N/A | N/A      |
| 84 | Liver | Hepatocarcinoma | Carcinoma      | Male   | 62 | 1   | incomplete | 5    | 1   | N/A | Yes | T1  | N0  | M0  | 2012/1/5   | 2016.05    | 51  | survival |
| 85 | Liver | Hepatocarcinoma | Para/Carcinoma | Male   | 62 | 3   | complete   | 7    | 2   | N/A | Yes | T3  | N0  | M0  | 2012/1/18  | 2016.05    | 51  | survival |
| 86 | Liver | Hepatocarcinoma | Carcinoma      | Male   | 62 | 1   | complete   | 2    | 1   | N/A | Yes | T1  | N0  | M0  | 2012/2/21  | 2016.06    | 50  | survival |
| 88 | Liver | Hepatocarcinoma | Para/Carcinoma | Male   | 62 | N/A | N/A        | 4    | N/A | N/A | Yes | N/A | N0  | M0  | N/A        | N/A        | N/A | N/A      |
| 93 | Liver | Hepatocarcinoma | Carcinoma      | Male   | 63 | N/A | N/A        | 3.5  | 1   | Yes | Yes | N/A | N/A | N/A | 2009/6/22  | 2011/12/5  | 30  | deceased |
| 91 | Liver | Hepatocarcinoma | Carcinoma      | Male   | 63 | 3   | N/A        | 10.5 | 1   | N/A | Yes | T3  | N0  | M0  | 2010/12/31 | 2011/11/15 | 11  | deceased |
| 90 | Liver | Hepatocarcinoma | Carcinoma      | Male   | 63 | 1   | complete   | 8    | 1   | N/A | Yes | T1  | N0  | M0  | 2012/4/11  | 2016/7/7   | 49  | deceased |
| 92 | Liver | Hepatocarcinoma | Carcinoma      | Male   | 63 | 1   | complete   | 6    | 1   | N/A | Yes | T1  | N0  | M0  | 2012/9/5   | 2016.06    | 43  | survival |

|     |       |                 |                |        |    |     |            |     |     |     |     |     |     |     |            |           |     |          |
|-----|-------|-----------------|----------------|--------|----|-----|------------|-----|-----|-----|-----|-----|-----|-----|------------|-----------|-----|----------|
| 94  | Liver | Hepatocarcinoma | Para/Carcinoma | Male   | 64 | N/A | N/A        | 4.5 | 1   | Yes | Yes | N/A | N/A | N/A | 2011/2/23  | 2015.9    | 55  | survival |
| 95  | Liver | Hepatocarcinoma | Carcinoma      | Male   | 65 | 1   | complete   | 6   | 1   | N/A | Yes | T1  | N0  | M0  | 2010/12/29 | 2016.04   | 64  | survival |
| 97  | Liver | Hepatocarcinoma | Para/Carcinoma | Male   | 65 | N/A | N/A        | 4   | 1   | Yes | Yes | N/A | N/A | N/A | 2009/10/27 | 2015.9    | 71  | survival |
| 96  | Liver | Hepatocarcinoma | Carcinoma      | Female | 65 | 3   | N/A        | 7   | N/A | N/A | Yes | T3  | N0  | M0  | N/A        | N/A       | N/A | N/A      |
| 99  | Liver | Hepatocarcinoma | Para/Carcinoma | Male   | 66 | N/A | N/A        | 2.5 | 1   | Yes | Yes | N/A | N/A | N/A | 2007/2/5   | 2015.9    | 103 | survival |
| 100 | Liver | Hepatocarcinoma | Para/Carcinoma | Female | 66 | N/A | N/A        | 5   | N/A | N/A | Yes | N/A | N/A | N/A | 2008/8/1   | 2011/1/18 | 29  | deceased |
| 98  | Liver | Hepatocarcinoma | Carcinoma      | Male   | 66 | N/A | N/A        | 1.5 | N/A | No  | Yes | N/A | N0  | M0  | N/A        | N/A       | N/A | N/A      |
| 101 | Liver | Hepatocarcinoma | Carcinoma      | Male   | 67 | 1   | complete   | 9   | 1   | N/A | Yes | T1  | N0  | M0  | 2011/4/13  | 2016.05   | 60  | survival |
| 104 | Liver | Hepatocarcinoma | Carcinoma      | Male   | 68 | N/A | N/A        | 3   | N/A | N/A | Yes | N/A | N/A | N/A | 2009/8/26  | 2015.9    | 73  | survival |
| 102 | Liver | Hepatocarcinoma | Carcinoma      | Male   | 68 | 1   | incomplete | 3   | 1   | N/A | Yes | T1  | N0  | M0  | 2012/4/11  | 2014/9/1  | 29  | deceased |
| 103 | Liver | Hepatocarcinoma | Carcinoma      | Male   | 68 | N/A | N/A        | 7   | N/A | N/A | Yes | N/A | N0  | M0  | N/A        | N/A       | N/A | N/A      |
| 106 | Liver | Hepatocarcinoma | Carcinoma      | Female | 69 | 3   | N/A        | 7   | N/A | N/A | Yes | T3  | N0  | M0  | N/A        | N/A       | N/A | N/A      |
| 105 | Liver | Hepatocarcinoma | Carcinoma      | Male   | 69 | 1   | complete   | 3   | 1   | N/A | Yes | T1  | N0  | M0  | 2012/4/7   | 2016.05   | 48  | survival |
| 107 | Liver | Hepatocarcinoma | Para/Carcinoma | Male   | 69 | N/A | N/A        | 10  | 1   | No  | Yes | N/A | N/A | N/A | 2012/11/27 | 2015/1/4  | 26  | deceased |
| 109 | Liver | Hepatocarcinoma | Carcinoma      | Male   | 70 | 1   | complete   | 5   | 1   | N/A | Yes | T1  | N0  | M0  | 2011/1/6   | 2014/4/15 | 39  | deceased |
| 108 | Liver | Hepatocarcinoma | Carcinoma      | Male   | 70 | 1   | complete   | 4.5 | 1   | N/A | Yes | T1  | N0  | M0  | 2012/2/15  | 2016.05   | 50  | survival |
| 110 | Liver | Hepatocarcinoma | Carcinoma      | Male   | 70 | 3   | N/A        | 6   | N/A | N/A | Yes | T3  | N0  | M0  | N/A        | N/A       | N/A | N/A      |
| 111 | Liver | Hepatocarcinoma | Carcinoma      | Female | 71 | 1   | incomplete | 4   | 1   | N/A | Yes | T1  | N0  | M0  | 2012/2/15  | 2016.05   | 50  | survival |
| 112 | Liver | Hepatocarcinoma | Carcinoma      | Male   | 72 | N/A | N/A        | 6   | 1   | No  | Yes | N/A | N/A | N/A | 2007/6/4   | 2013/4/7  | 70  | deceased |
| 113 | Liver | Hepatocarcinoma | Carcinoma      | Male   | 72 | N/A | N/A        | 4   | 1   | Yes | Yes | N/A | N/A | N/A | 2010/10/14 | 2013/10/6 | 36  | deceased |
| 114 | Liver | Hepatocarcinoma | Carcinoma      | Male   | 73 | N/A | N/A        | 2.5 | N/A | No  | Yes | N/A | N0  | M0  | N/A        | N/A       | N/A | N/A      |
| 115 | Liver | Hepatocarcinoma | Para/Carcinoma | Male   | 74 | N/A | N/A        | 6   | 1   | No  | Yes | N/A | N/A | N/A | 2008/12/8  | 2015.9    | 81  | survival |
| 116 | Liver | Hepatocarcinoma | Carcinoma      | Male   | 79 | 1   | complete   | 7.5 | 1   | N/A | Yes | T1  | N0  | M0  | 2012/4/17  | 2013/7/1  | 15  | deceased |
