# Supplementary material for: Nur77-activated lncRNA WFDC21P attenuates hepatocarcinogenesis via modulating glycolysis
Source: PubMed Central journal article supplement (PMC7067692; doi:10.1038/s41388-020-1158-y), 2020-01-20
Supplement: 41388_2020_1158_MOESM4_ESM.pdf [file 41388_2020_1158_MOESM4_ESM.pdf]

**Table S3. The list of WFDC21P-interacting proteins identified by mass spectrometry.**

|    | Accession             | Name                                                                                               | Species |
|----|-----------------------|----------------------------------------------------------------------------------------------------|---------|
| 1  | sp P04264 K2C1_HUMAN  | Keratin, type II cytoskeletal 1 OS=Homo sapiens GN=KRT1 PE=1 SV=6                                  | HUMAN   |
| 2  | sp P07355 ANXA2_HUMAN | Annexin A2 OS=Homo sapiens GN=ANXA2 PE=1 SV=2                                                      | HUMAN   |
| 3  | sp P13645 K1C10_HUMAN | Keratin, type I cytoskeletal 10 OS=Homo sapiens GN=KRT10 PE=1 SV=6                                 | HUMAN   |
| 4  | sp P22626 ROA2_HUMAN  | Heterogeneous nuclear ribonucleoproteins A2/B1 OS=Homo sapiens GN=HNRNPA2B1 PE=1 SV=2              | HUMAN   |
| 5  | sp P14923 PLAK_HUMAN  | Junction plakoglobin OS=Homo sapiens GN=JUP PE=1 SV=3                                              | HUMAN   |
| 6  | sp P15924 DESP_HUMAN  | Desmoplakin OS=Homo sapiens GN=DSP PE=1 SV=3                                                       | HUMAN   |
| 7  | sp P09651 ROA1_HUMAN  | Heterogeneous nuclear ribonucleoprotein A1 OS=Homo sapiens GN=HNRNPA1 PE=1 SV=5                    | HUMAN   |
| 8  | sp O43790 KRT86_HUMAN | Keratin, type II cuticular Hb6 OS=Homo sapiens GN=KRT86 PE=1 SV=1                                  | HUMAN   |
| 9  | sp P35908 K22E_HUMAN  | Keratin, type II cytoskeletal 2 epidermal OS=Homo sapiens GN=KRT2 PE=1 SV=2                        | HUMAN   |
| 10 | sp P62873 GBB1_HUMAN  | Guanine nucleotide-binding protein G(I)/G(S)/G(T) subunit beta-1 OS=Homo sapiens GN=GNB1 PE=1 SV=3 | HUMAN   |
| 11 | sp Q92764 KRT35_HUMAN | Keratin, type I cuticular Ha5 OS=Homo sapiens GN=KRT35 PE=2 SV=5                                   | HUMAN   |
| 12 | sp P78386 KRT85_HUMAN | Keratin, type II cuticular Hb5 OS=Homo sapiens GN=KRT85 PE=1 SV=1                                  | HUMAN   |
| 13 | sp P63261 ACTG_HUMAN  | Actin, cytoplasmic 2 OS=Homo sapiens GN=ACTG1 PE=1 SV=1                                            | HUMAN   |
| 14 | sp P60174 TPIS_HUMAN  | Triosephosphate isomerase OS=Homo sapiens GN=TPI1 PE=1 SV=3                                        | HUMAN   |
| 15 | sp P52907 CAZA1_HUMAN | F-actin-capping protein subunit alpha-1 OS=Homo sapiens GN=CAPZA1 PE=1 SV=3                        | HUMAN   |
| 16 | sp P68363 TBA1B_HUMAN | Tubulin alpha-1B chain OS=Homo sapiens GN=TUBA1B PE=1 SV=1                                         | HUMAN   |
| 17 | sp P35527 K1C9_HUMAN  | Keratin, type I cytoskeletal 9 OS=Homo sapiens GN=KRT9 PE=1 SV=3                                   | HUMAN   |
| 18 | sp P62879 GBB2_HUMAN  | Guanine nucleotide-binding protein G(I)/G(S)/G(T) subunit beta-2 OS=Homo sapiens GN=GNB2 PE=1 SV=3 | HUMAN   |
| 19 | sp P11142 HSP7C_HUMAN | Heat shock cognate 71 kDa protein OS=Homo sapiens GN=HSPA8 PE=1 SV=1                               | HUMAN   |
| 20 | sp Q13835 PKP1_HUMAN  | Plakophilin-1 OS=Homo sapiens GN=PKP1 PE=1 SV=2                                                    | HUMAN   |
| 21 | sp P62805 H4_HUMAN    | Histone H4 OS=Homo sapiens GN=HIST1H4A PE=1 SV=2                                                   | HUMAN   |
| 22 | sp Q13885 TBB2A_HUMAN | Tubulin beta-2A chain OS=Homo sapiens GN=TUBB2A PE=1 SV=1                                          | HUMAN   |
| 23 | sp P02533 K1C14_HUMAN | Keratin, type I cytoskeletal 14 OS=Homo sapiens GN=KRT14 PE=1 SV=4                                 | HUMAN   |
| 24 | sp Q15323 K1H1_HUMAN  | Keratin, type I cuticular Ha1 OS=Homo sapiens GN=KRT31 PE=2 SV=3                                   | HUMAN   |
| 25 | sp P13647 K2C5_HUMAN  | Keratin, type II cytoskeletal 5 OS=Homo sapiens GN=KRT5 PE=1 SV=3                                  | HUMAN   |
| 26 | sp Q14525 KT33B_HUMAN | Keratin, type I cuticular Ha3-II OS=Homo sapiens GN=KRT33B PE=2 SV=3                               | HUMAN   |
| 27 | sp P31947 1433S_HUMAN | 14-3-3 protein sigma OS=Homo sapiens GN=SFN PE=1 SV=1                                              | HUMAN   |
| 28 | sp P30041 PRDX6_HUMAN | Peroxiredoxin-6 OS=Homo sapiens GN=PRDX6 PE=1 SV=3                                                 | HUMAN   |
| 29 | sp P04406 G3P_HUMAN   | Glyceraldehyde-3-phosphate dehydrogenase OS=Homo sapiens GN=GAPDH PE=1 SV=3                        | HUMAN   |
| 30 | sp Q8TF66 LRC15_HUMAN | Leucine-rich repeat-containing protein 15 OS=Homo sapiens GN=LRR15 PE=1 SV=2                       | HUMAN   |
| 31 | sp P16403 H12_HUMAN   | Histone H1.2 OS=Homo sapiens GN=HIST1H1C PE=1 SV=2                                                 | HUMAN   |
| 32 | sp P08107 HSP71_HUMAN | Heat shock 70 kDa protein 1A/1B OS=Homo sapiens GN=HSPA1A PE=1 SV=5                                | HUMAN   |
| 33 | sp P47755 CAZA2_HUMAN | F-actin-capping protein subunit alpha-2 OS=Homo sapiens GN=CAPZA2 PE=1 SV=3                        | HUMAN   |
| 34 | sp P11021 GRP78_HUMAN | 78 kDa glucose-regulated protein OS=Homo sapiens GN=HSPA5 PE=1 SV=2                                | HUMAN   |
| 35 | sp P05787 K2C8_HUMAN  | Keratin, type II cytoskeletal 8 OS=Homo sapiens GN=KRT8 PE=1 SV=7                                  | HUMAN   |

|    |                       |                                                                                                      |       |
|----|-----------------------|------------------------------------------------------------------------------------------------------|-------|
| 36 | sp Q5VTE0 EF1A3_HUMAN | Putative elongation factor 1-alpha-like 3 OS=Homo sapiens GN=EEF1A1P5 PE=5 SV=1                      | HUMAN |
| 37 | sp Q99880 H2B1L_HUMAN | Histone H2B type 1-L OS=Homo sapiens GN=HIST1H2BL PE=1 SV=3                                          | HUMAN |
| 38 | sp P07195 LDHB_HUMAN  | L-lactate dehydrogenase B chain OS=Homo sapiens GN=LDHB PE=1 SV=2                                    | HUMAN |
| 39 | sp Q71D13 H32_HUMAN   | Histone H3.2 OS=Homo sapiens GN=HIST2H3A PE=1 SV=3                                                   | HUMAN |
| 40 | sp P04792 HSPB1_HUMAN | Heat shock protein beta-1 OS=Homo sapiens GN=HSPB1 PE=1 SV=2                                         | HUMAN |
| 41 | sp Q9NSB4 KRT82_HUMAN | Keratin, type II cuticular Hb2 OS=Homo sapiens GN=KRT82 PE=1 SV=3                                    | HUMAN |
| 42 | sp P31942 HNRH3_HUMAN | Heterogeneous nuclear ribonucleoprotein H3 OS=Homo sapiens GN=HNRNPH3 PE=1 SV=2                      | HUMAN |
| 43 | sp P63104 1433Z_HUMAN | 14-3-3 protein zeta/delta OS=Homo sapiens GN=YWHAZ PE=1 SV=1                                         | HUMAN |
| 44 | sp P13987 CD59_HUMAN  | CD59 glycoprotein OS=Homo sapiens GN=CD59 PE=1 SV=1                                                  | HUMAN |
| 45 | sp P68371 TBB4B_HUMAN | Tubulin beta-4B chain OS=Homo sapiens GN=TUBB4B PE=1 SV=1                                            | HUMAN |
| 46 | sp P60900 PSA6_HUMAN  | Proteasome subunit alpha type-6 OS=Homo sapiens GN=PSMA6 PE=1 SV=1                                   | HUMAN |
| 47 | sp P62906 RL10A_HUMAN | 60S ribosomal protein L10a OS=Homo sapiens GN=RPL10A PE=1 SV=2                                       | HUMAN |
| 48 | sp Q9BTM1 H2AJ_HUMAN  | Histone H2A.J OS=Homo sapiens GN=H2AFJ PE=1 SV=1                                                     | HUMAN |
| 49 | sp P39687 AN32A_HUMAN | Acidic leucine-rich nuclear phosphoprotein 32 family member A OS=Homo sapiens GN=ANP32A PE=1 SV=1    | HUMAN |
| 50 | sp P62136 PP1A_HUMAN  | Serine/threonine-protein phosphatase PP1-alpha catalytic subunit OS=Homo sapiens GN=PPP1CA PE=1 SV=1 | HUMAN |
| 51 | sp P46777 RL5_HUMAN   | 60S ribosomal protein L5 OS=Homo sapiens GN=RPL5 PE=1 SV=3                                           | HUMAN |
| 52 | sp Q9Y446 PKP3_HUMAN  | Plakophilin-3 OS=Homo sapiens GN=PKP3 PE=1 SV=1                                                      | HUMAN |
| 53 | sp P62937 PPIA_HUMAN  | Peptidyl-prolyl cis-trans isomerase A OS=Homo sapiens GN=PPIA PE=1 SV=2                              | HUMAN |
| 54 | sp P62241 RS8_HUMAN   | 40S ribosomal protein S8 OS=Homo sapiens GN=RPS8 PE=1 SV=2                                           | HUMAN |
| 55 | sp P62987 RL40_HUMAN  | Ubiquitin-60S ribosomal protein L40 OS=Homo sapiens GN=UBA52 PE=1 SV=2                               | HUMAN |
| 56 | sp P05187 PPB1_HUMAN  | Alkaline phosphatase, placental type OS=Homo sapiens GN=ALPP PE=1 SV=2                               | HUMAN |
| 57 | sp Q86SJ6 DSG4_HUMAN  | Desmoglein-4 OS=Homo sapiens GN=DSG4 PE=1 SV=1                                                       | HUMAN |
| 58 | sp Q13162 PRDX4_HUMAN | Peroxiredoxin-4 OS=Homo sapiens GN=PRDX4 PE=1 SV=1                                                   | HUMAN |
| 59 | sp Q9NP59 S40A1_HUMAN | Solute carrier family 40 member 1 OS=Homo sapiens GN=SLC40A1 PE=1 SV=1                               | HUMAN |
| 60 | sp Q13151 ROA0_HUMAN  | Heterogeneous nuclear ribonucleoprotein A0 OS=Homo sapiens GN=HNRNPA0 PE=1 SV=1                      | HUMAN |
| 61 | sp P02768 ALBU_HUMAN  | Serum albumin OS=Homo sapiens GN=ALB PE=1 SV=2                                                       | HUMAN |
| 62 | sp Q5VU13 VSIG8_HUMAN | V-set and immunoglobulin domain-containing protein 8 OS=Homo sapiens GN=VSIG8 PE=1 SV=1              | HUMAN |
| 63 | sp P27348 1433T_HUMAN | 14-3-3 protein theta OS=Homo sapiens GN=YWHAQ PE=1 SV=1                                              | HUMAN |
| 64 | sp P31946 1433B_HUMAN | 14-3-3 protein beta/alpha OS=Homo sapiens GN=YWHAB PE=1 SV=3                                         | HUMAN |
| 65 | sp P62258 1433E_HUMAN | 14-3-3 protein epsilon OS=Homo sapiens GN=YWHAE PE=1 SV=1                                            | HUMAN |
| 66 | sp O76013 KRT36_HUMAN | Keratin, type I cuticular Ha6 OS=Homo sapiens GN=KRT36 PE=1 SV=1                                     | HUMAN |
| 67 | sp P06576 ATPB_HUMAN  | ATP synthase subunit beta, mitochondrial OS=Homo sapiens GN=ATP5B PE=1 SV=3                          | HUMAN |
| 68 | sp P08865 RSSA_HUMAN  | 40S ribosomal protein SA OS=Homo sapiens GN=RPSA PE=1 SV=4                                           | HUMAN |
| 69 | sp Q13228 SBP1_HUMAN  | Selenium-binding protein 1 OS=Homo sapiens GN=SELENBP1 PE=1 SV=2                                     | HUMAN |
| 70 | sp P13639 EF2_HUMAN   | Elongation factor 2 OS=Homo sapiens GN=EEF2 PE=1 SV=4                                                | HUMAN |
| 71 | sp P81605 DCD_HUMAN   | Dermcidin OS=Homo sapiens GN=DCD PE=1 SV=2                                                           | HUMAN |
| 72 | sp P62081 RS7_HUMAN   | 40S ribosomal protein S7 OS=Homo sapiens GN=RPS7 PE=1 SV=1                                           | HUMAN |
| 73 | sp Q8IUC1 KR111_HUMAN | Keratin-associated protein 11-1 OS=Homo sapiens GN=KRTAP11-1 PE=1 SV=1                               | HUMAN |

|     |                       |                                                                                                   |       |
|-----|-----------------------|---------------------------------------------------------------------------------------------------|-------|
| 74  | sp P51149 RAB7A_HUMAN | Ras-related protein Rab-7a OS=Homo sapiens GN=RAB7A PE=1 SV=1                                     | HUMAN |
| 75  | sp P48147 PPCE_HUMAN  | Prolyl endopeptidase OS=Homo sapiens GN=PREP PE=1 SV=2                                            | HUMAN |
| 76  | sp P18124 RL7_HUMAN   | 60S ribosomal protein L7 OS=Homo sapiens GN=RPL7 PE=1 SV=1                                        | HUMAN |
| 77  | sp Q9BYU5 KRA21_HUMAN | Keratin-associated protein 2-1 OS=Homo sapiens GN=KRTAP2-1 PE=2 SV=2                              | HUMAN |
| 78  | sp Q9BUL8 PDC10_HUMAN | Programmed cell death protein 10 OS=Homo sapiens GN=PDCD10 PE=1 SV=1                              | HUMAN |
| 79  | sp Q15366 PCBP2_HUMAN | Poly(rC)-binding protein 2 OS=Homo sapiens GN=PCBP2 PE=1 SV=1                                     | HUMAN |
| 80  | sp P28838 AMPL_HUMAN  | Cytosol aminopeptidase OS=Homo sapiens GN=LAP3 PE=1 SV=3                                          | HUMAN |
| 81  | sp P26641 EF1G_HUMAN  | Elongation factor 1-gamma OS=Homo sapiens GN=EEF1G PE=1 SV=3                                      | HUMAN |
| 82  | sp P14618 KPYM_HUMAN  | Pyruvate kinase PKM OS=Homo sapiens GN=PKM PE=1 SV=4                                              | HUMAN |
| 83  | sp P12004 PCNA_HUMAN  | Proliferating cell nuclear antigen OS=Homo sapiens GN=PCNA PE=1 SV=1                              | HUMAN |
| 84  | sp P07477 TRY1_HUMAN  | Trypsin-1 OS=Homo sapiens GN=PRSS1 PE=1 SV=1                                                      | HUMAN |
| 85  | sp Q10589 BST2_HUMAN  | Bone marrow stromal antigen 2 OS=Homo sapiens GN=BST2 PE=1 SV=1                                   | HUMAN |
| 86  | sp Q3LI64 KRA61_HUMAN | Keratin-associated protein 6-1 OS=Homo sapiens GN=KRTAP6-1 PE=2 SV=1                              | HUMAN |
| 87  | sp P37837 TALDO_HUMAN | Transaldolase OS=Homo sapiens GN=TALDO1 PE=1 SV=2                                                 | HUMAN |
| 88  | sp P23396 RS3_HUMAN   | 40S ribosomal protein S3 OS=Homo sapiens GN=RPS3 PE=1 SV=2                                        | HUMAN |
| 89  | sp P12273 PIP_HUMAN   | Prolactin-inducible protein OS=Homo sapiens GN=PIP PE=1 SV=1                                      | HUMAN |
| 90  | sp P18669 PGAM1_HUMAN | Phosphoglycerate mutase 1 OS=Homo sapiens GN=PGAM1 PE=1 SV=2                                      | HUMAN |
| 91  | sp P40925 MDHC_HUMAN  | Malate dehydrogenase, cytoplasmic OS=Homo sapiens GN=MDH1 PE=1 SV=4                               | HUMAN |
| 92  | sp Q53RT3 APRV1_HUMAN | Retroviral-like aspartic protease 1 OS=Homo sapiens GN=ASPRV1 PE=1 SV=1                           | HUMAN |
| 93  | sp P17931 LEG3_HUMAN  | Galectin-3 OS=Homo sapiens GN=LGALS3 PE=1 SV=5                                                    | HUMAN |
| 94  | sp P08238 HS90B_HUMAN | Heat shock protein HSP 90-beta OS=Homo sapiens GN=HSP90AB1 PE=1 SV=4                              | HUMAN |
| 95  | sp P22392 NDKB_HUMAN  | Nucleoside diphosphate kinase B OS=Homo sapiens GN=NME2 PE=1 SV=1                                 | HUMAN |
| 96  | sp P35030 TRY3_HUMAN  | Trypsin-3 OS=Homo sapiens GN=PRSS3 PE=1 SV=2                                                      | HUMAN |
| 97  | sp P21291 CSRP1_HUMAN | Cysteine and glycine-rich protein 1 OS=Homo sapiens GN=CSRP1 PE=1 SV=3                            | HUMAN |
| 98  | sp Q9Y4J8 DTNA_HUMAN  | Dystrobrevin alpha OS=Homo sapiens GN=DTNA PE=1 SV=2                                              | HUMAN |
| 99  | sp O75083 WDR1_HUMAN  | WD repeat-containing protein 1 OS=Homo sapiens GN=WDR1 PE=1 SV=4                                  | HUMAN |
| 100 | sp P25311 ZA2G_HUMAN  | Zinc-alpha-2-glycoprotein OS=Homo sapiens GN=AZGP1 PE=1 SV=2                                      | HUMAN |
| 101 | sp Q5FWF4 ZRAB3_HUMAN | DNA annealing helicase and endonuclease ZRANB3 OS=Homo sapiens GN=ZRANB3 PE=1 SV=2                | HUMAN |
| 102 | sp Q92688 AN32B_HUMAN | Acidic leucine-rich nuclear phosphoprotein 32 family member B OS=Homo sapiens GN=ANP32B PE=1 SV=1 | HUMAN |
| 103 | sp P00403 COX2_HUMAN  | Cytochrome c oxidase subunit 2 OS=Homo sapiens GN=MT-CO2 PE=1 SV=1                                | HUMAN |
| 104 | sp P07947 YES_HUMAN   | Tyrosine-protein kinase Yes OS=Homo sapiens GN=YES1 PE=1 SV=3                                     | HUMAN |
